# Supplementary material
Source: Royal Society of Chemistry journal article supplement (doi:10.1039/d6ta01503d)
Supplement: d6ta01503d1.pdf [file d6ta01503d1.pdf]

Supporting information

## Achieving the directional zinc ions transport in belt-like orderly arranged vanadium dioxide cathode material

*Siyang Han<sup>1</sup>, Hongxu, Zhou<sup>1</sup>, Weichen Han<sup>1</sup>, Jingang Zheng<sup>1</sup>, Hongwei Zhao<sup>1</sup>, Lixiang*

*Li<sup>1</sup>, Baigang An<sup>1\*</sup> and Chengguo Sun<sup>1,2\*</sup>*

<sup>1</sup> School of Chemical Engineering, University of Science and Technology Liaoning, Anshan 114051, P. R. China

<sup>2</sup> School of Chemical Engineering, Nanjing University of Science and Technology, Nanjing, Jiangsu 210094, P. R. China

\*Corresponding author.

E-mail address: [bgan@ustl.edu.cn](mailto:bgan@ustl.edu.cn) (Baigang An), [sunyangguo2004@163.com](mailto:sunyangguo2004@163.com) (Chengguo Sun)

## 1. Supplementary Figures

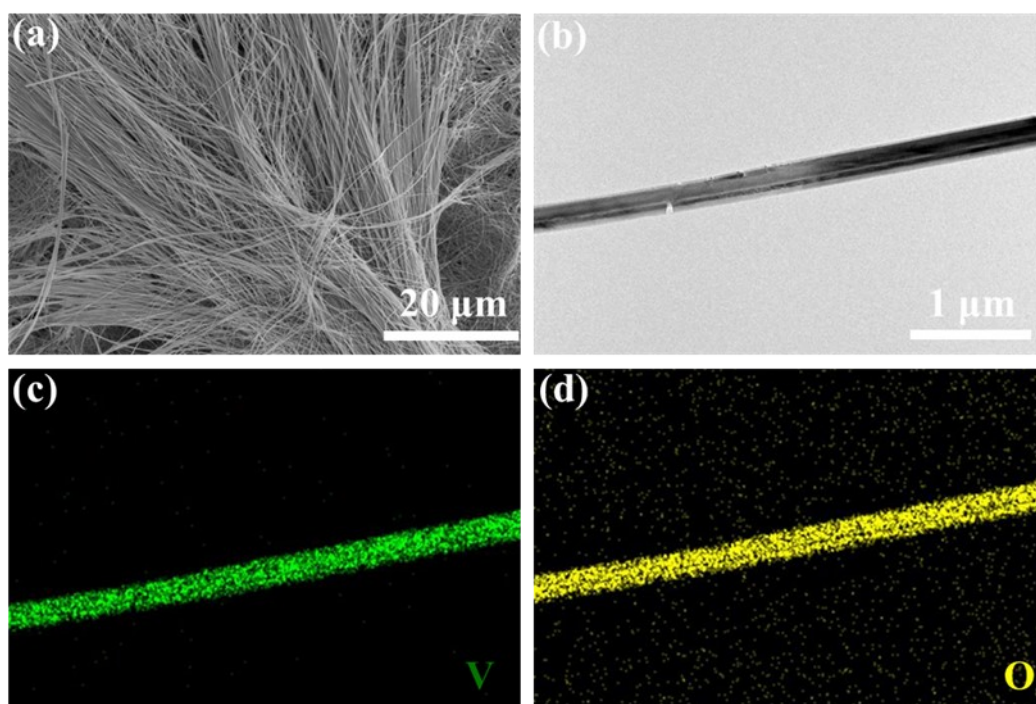

**Fig. S1** (a) SEM image of B-VO<sub>2</sub>. (b-d) HAADF-STEM images of B-VO<sub>2</sub> and corresponding elemental mapping of V and O.

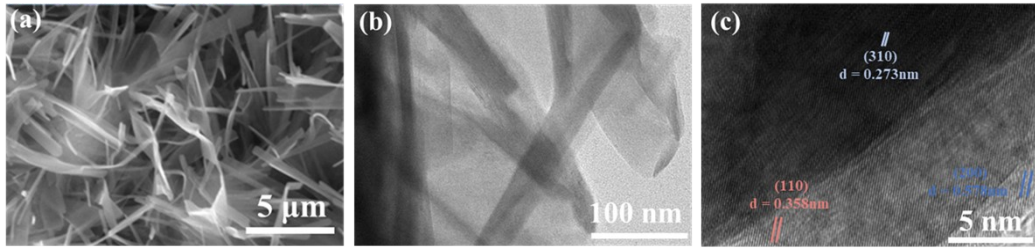

**Fig. S2** (a-c) SEM, TEM, and HRTEM images of C-VO<sub>2</sub>.

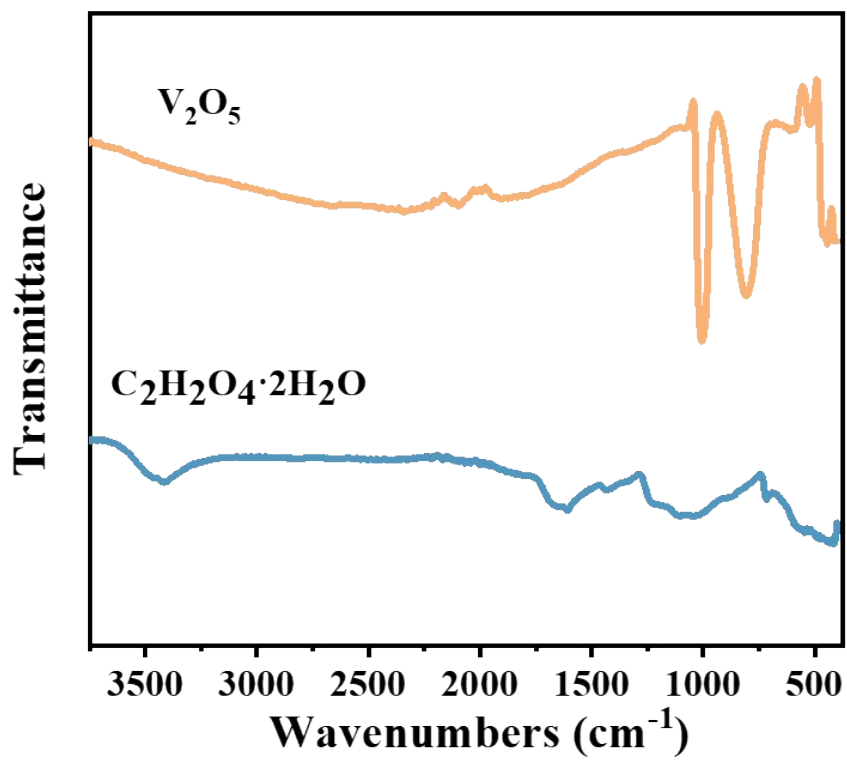

**Fig. S3** FTIR spectra of  $\text{V}_2\text{O}_5$  and  $\text{C}_2\text{H}_2\text{O}_4 \cdot 2\text{H}_2\text{O}$ .

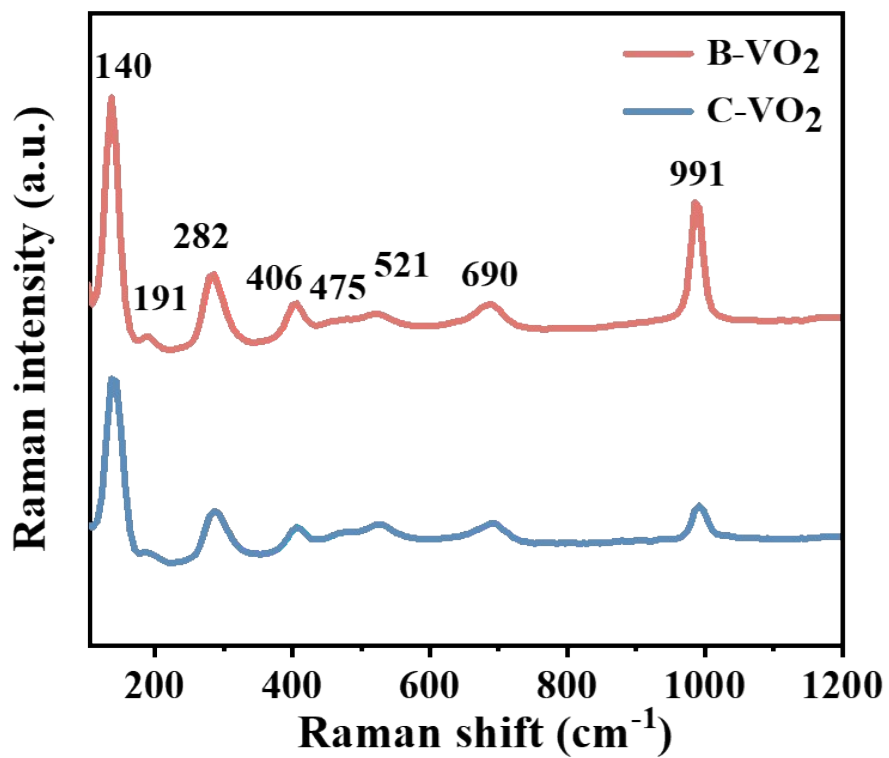

Fig. S4 Raman spectra of B-VO<sub>2</sub> and C-VO<sub>2</sub>.

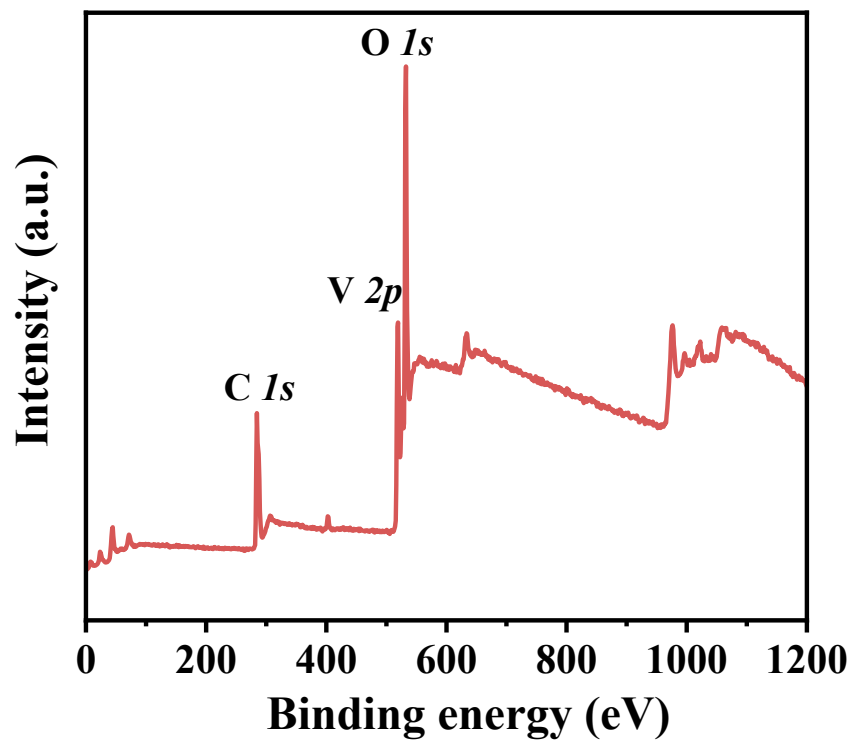

Fig. S5 XPS wide spectra of B-VO<sub>2</sub>.

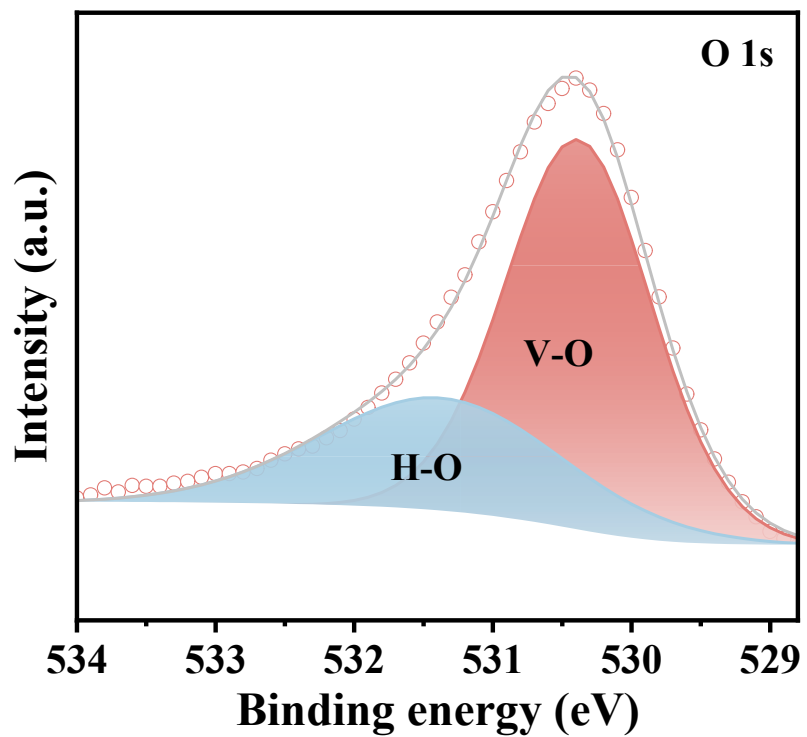

Fig. S6 XPS O 1s spectra of B-VO<sub>2</sub>.

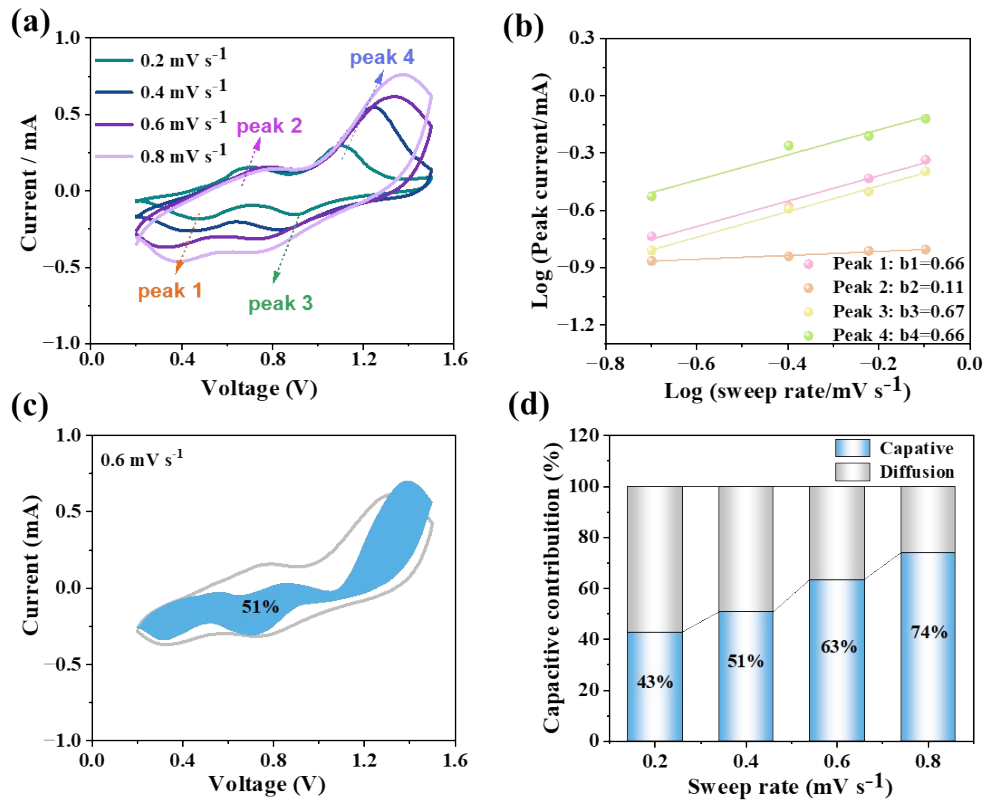

**Fig. S7** (a) CV curves of C-VO<sub>2</sub> electrode at various scan rates; (b) log (peak current) versus log (sweep rate) plots according to the CV data at selected oxidation/reduction peaks; (c) CV curves of the C-VO<sub>2</sub> electrodes with capacity separation at 0.6 mV s<sup>-1</sup>; (d) The capacitive contributions of C-VO<sub>2</sub> electrode at different scan rates.

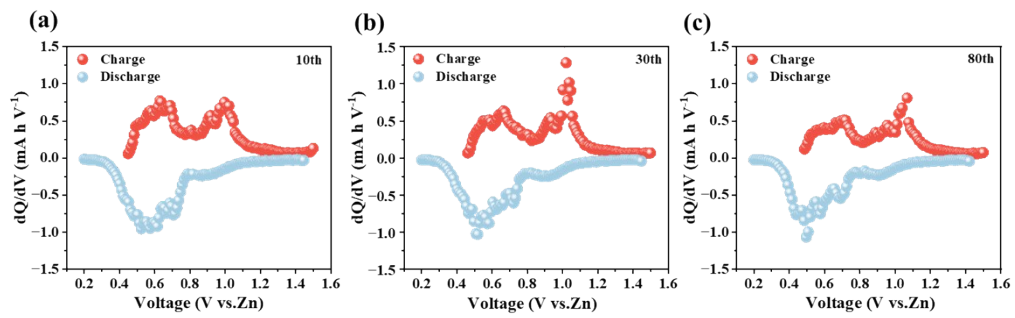

**Fig.**

**S8**  $dQ/dV$  curves of the B-VO<sub>2</sub> of (a) 10th, (b) 30th and (c) 80th cycle 0.2 A g<sup>-1</sup>.

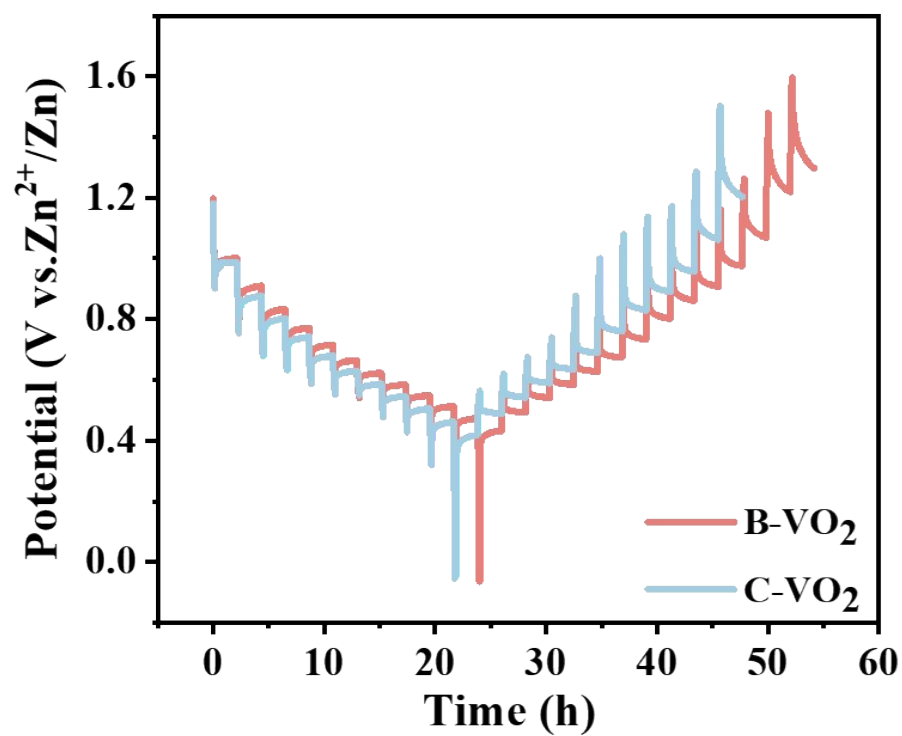

**Fig. S9** Charge-discharge curves in the GITT measurement of B-VO<sub>2</sub> and C-VO<sub>2</sub> electrode at 0.2 A g<sup>-1</sup>.

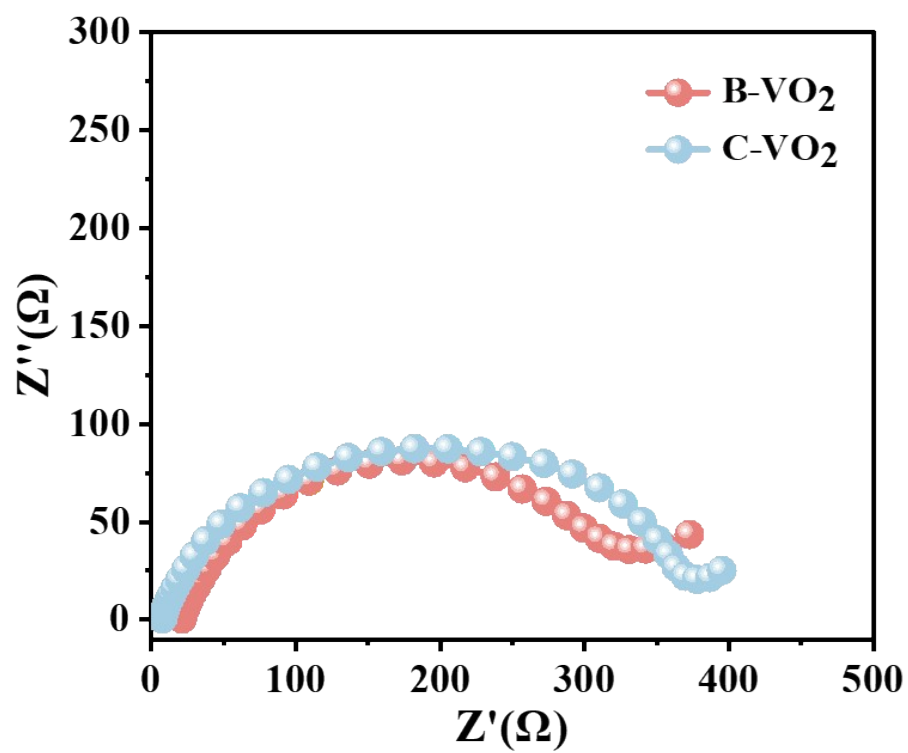

Fig. S10 EIS plots of the B-VO<sub>2</sub> and C-VO<sub>2</sub>.

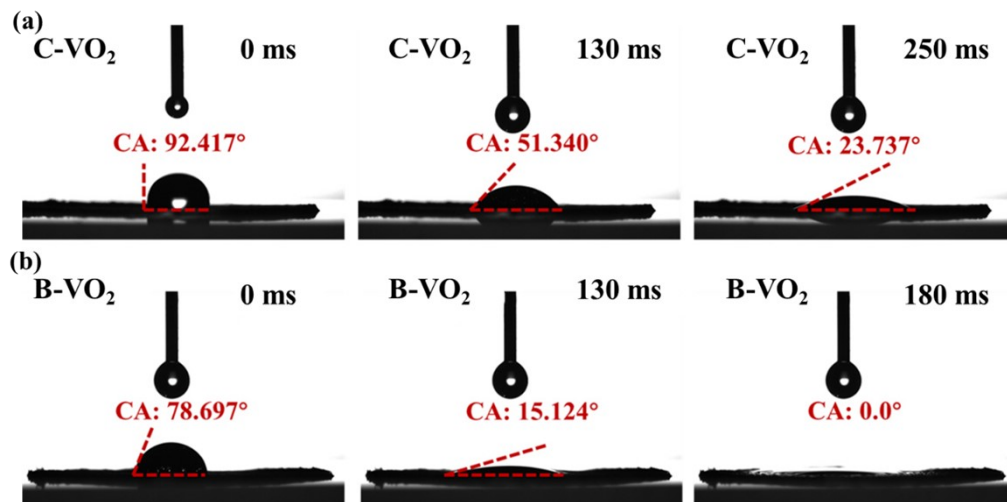

**Fig. S11** Contact angle measurements of the Zn(OTf)<sub>2</sub> on the B-VO<sub>2</sub> and C-VO<sub>2</sub> electrode.

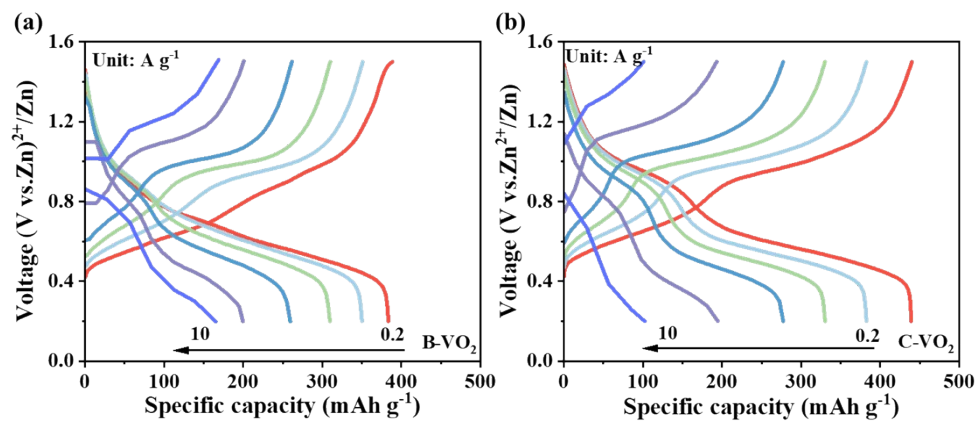

**Fig. S12** GCD curves of electrode at different current densities: (a) B-VO<sub>2</sub>, (b) C-VO<sub>2</sub>.

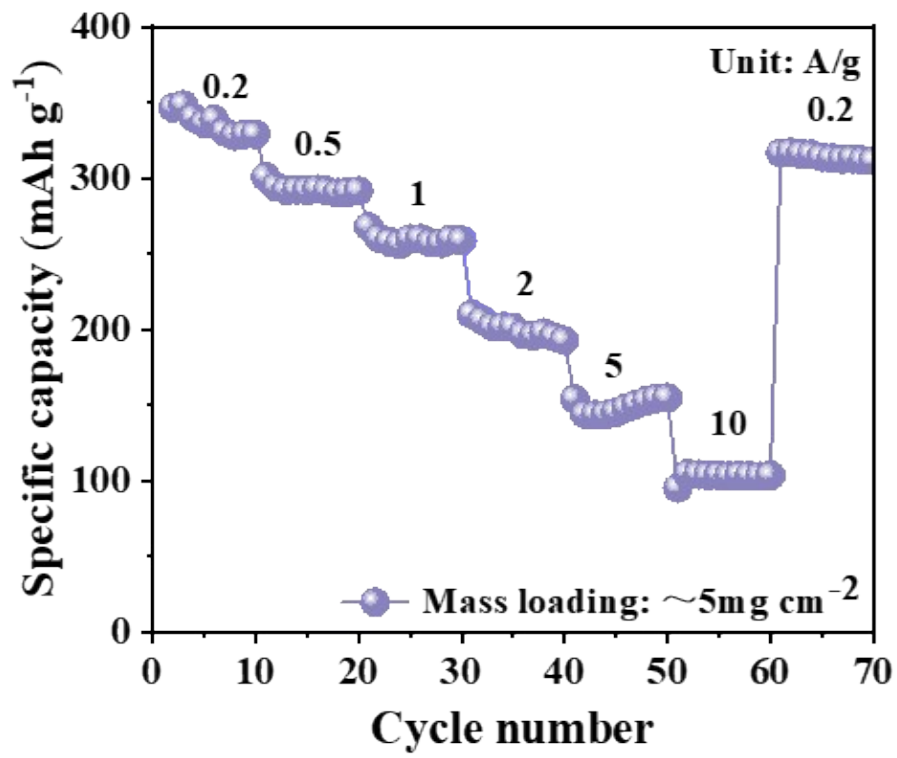

Fig. S13 Rate performance for B-VO<sub>2</sub> with higher mass loading.

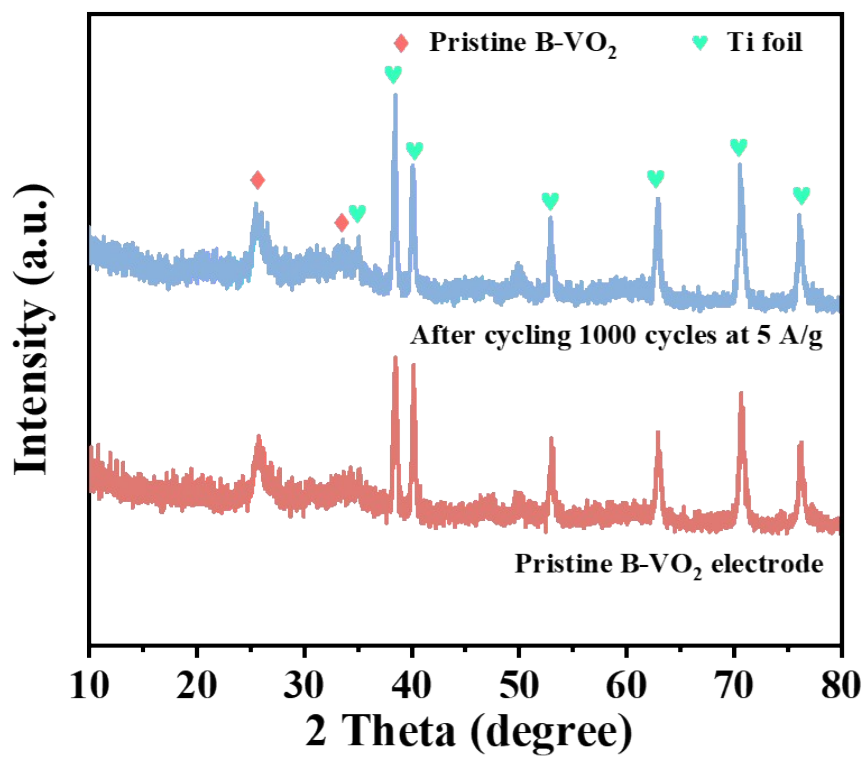

Fig. S14 XRD patterns of B-VO<sub>2</sub> electrodes under pristine and cycled states.

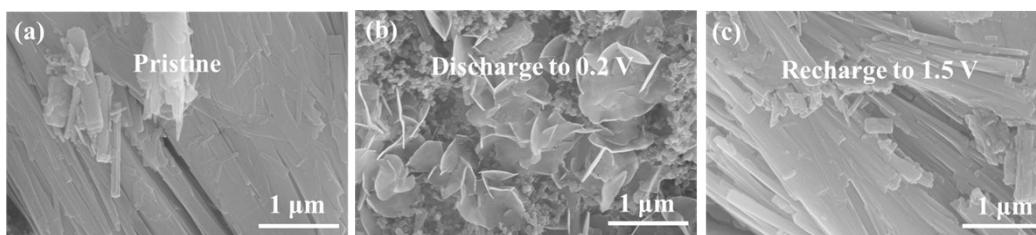

**Fig. S15** SEM images of B-VO<sub>2</sub> Electrode at different charging/discharging states.

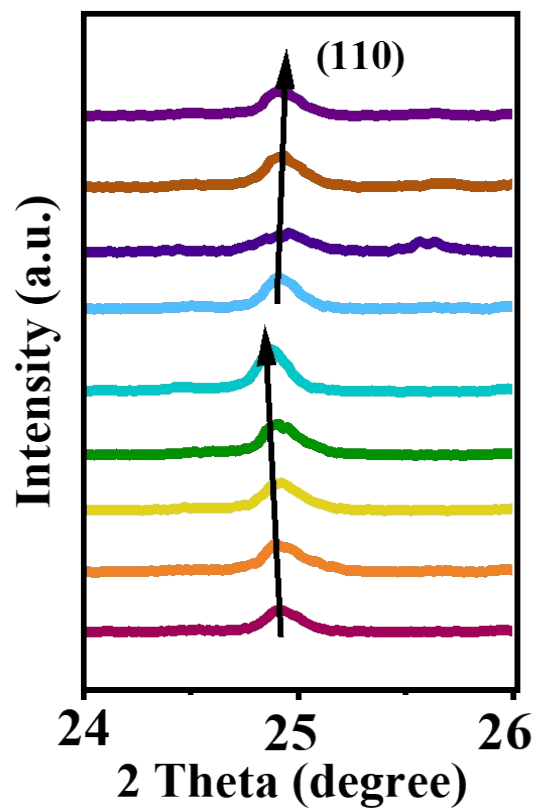

**Fig. S16** Magnified view of the (110) peaks in Figure 5b.

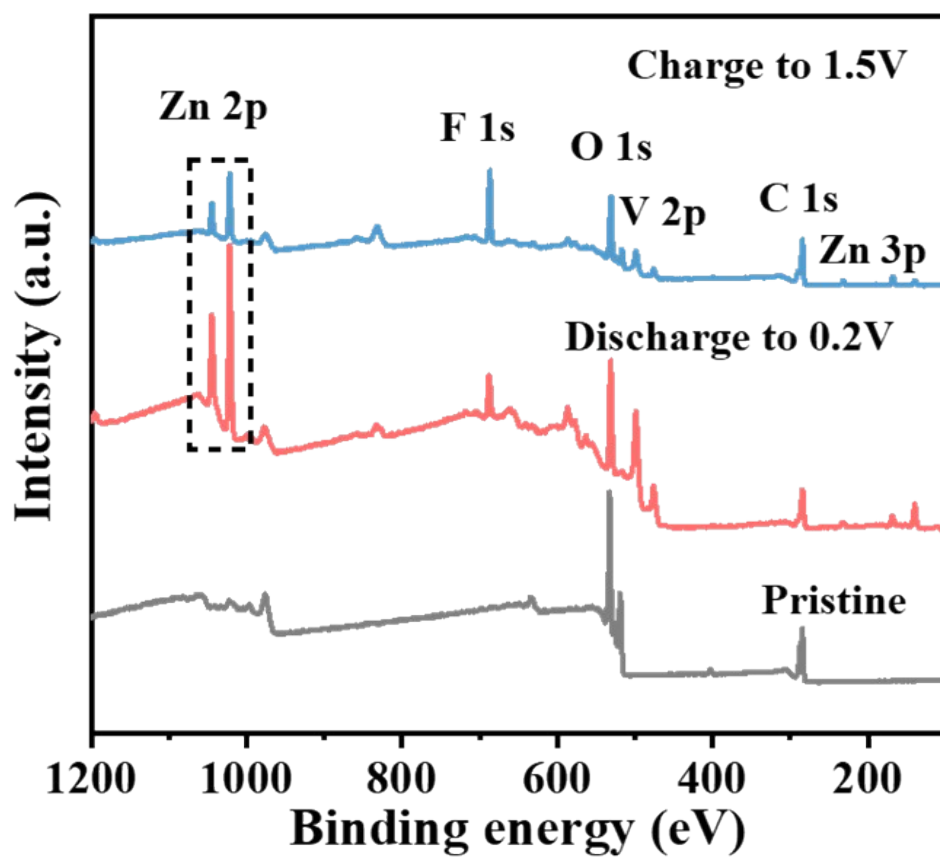

Fig. S17 XPS wide spectra of B-VO<sub>2</sub> electrode at different charge/discharge states.

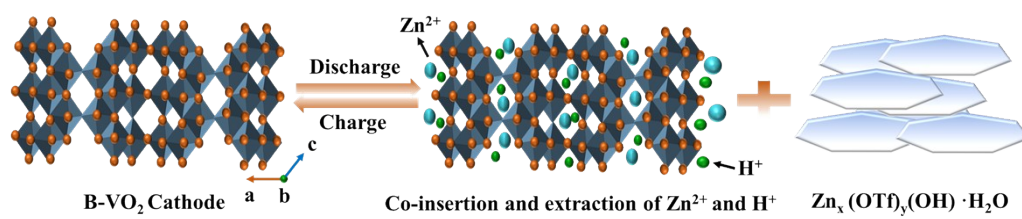

**Fig. S18** Schematic diagram of the energy storage mechanism of B-VO<sub>2</sub>.

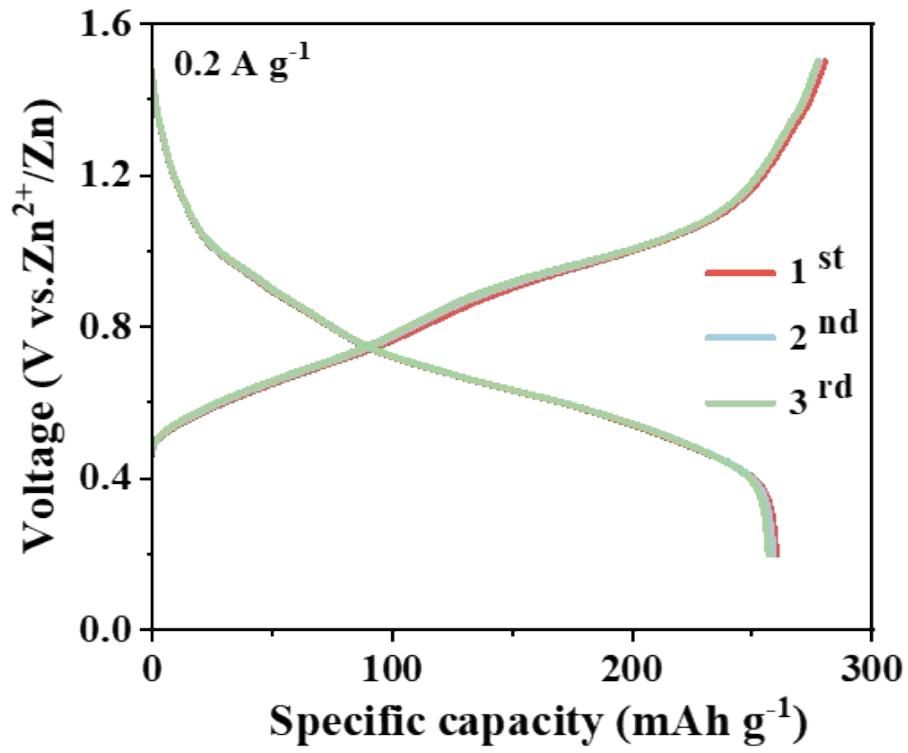

**Fig. S19** The galvanostatic charge-discharge curves of Zn||B-VO<sub>2</sub> pouch cell at 0.2 A g<sup>-1</sup>.

## 2. Supplementary Tables

**Table S1** Comparison of  $\text{Zn}^{2+}$  diffusion coefficient for B- $\text{VO}_2$  and the previously reported vanadium-based cathodes in AZIBs.

| Cathodes                                | $D_{\text{Zn}}$ ( $\text{cm}^2 \text{ s}^{-1}$ ) | References |
|-----------------------------------------|--------------------------------------------------|------------|
| $\text{V}_2\text{O}_3$                  | $10^{-11}$ - $10^{-13}$                          | [1]        |
| $\text{V}_5\text{O}_{12}$               | $10^{-9}$ - $10^{-12}$                           | [2]        |
| $\text{VN}_{0.9}\text{O}_{0.15}$        | $10^{-11}$ - $10^{-12}$                          | [3]        |
| KVO                                     | $10^{-9}$ - $10^{-11}$                           | [4]        |
| PVSF-2/1                                | $10^{-9}$ - $10^{-11}$                           | [5]        |
| $\text{Mg-NH}_4\text{V}_4\text{O}_{10}$ | $10^{-10}$ - $10^{-12}$                          | [6]        |
| $\text{VO}_2$ - rGO                     | $10^{-11}$ - $10^{-13}$                          | [7]        |
| CVO                                     | $10^{-9}$ - $10^{-11}$                           | [8]        |
| TOBI                                    | $10^{-11}$ - $10^{-13}$                          | [9]        |
| VN-2                                    | $10^{-11}$ - $10^{-13}$                          | [10]       |
| VO                                      | $10^{-11}$ - $10^{-13}$                          | [11]       |
| B- $\text{VO}_2$                        | $10^{-8}$ - $10^{-10}$                           | This work  |

**Table S2** Comparison of electrochemical properties of B-VO<sub>2</sub> with previously reported vanadium-based cathodes in AZIBs.

| Electrode materials                    | Specific capacity<br>(mAh g <sup>-1</sup> at A g <sup>-1</sup> ) | Cycling stability                      | Reference |
|----------------------------------------|------------------------------------------------------------------|----------------------------------------|-----------|
| PVSF-2/1                               | 398.9 (0.2)                                                      | 78.5% at 5 A g <sup>-1</sup><br>(2000) | [5]       |
| CaVO                                   | 489.8 (0.1)                                                      | 71% at 3 A g <sup>-1</sup><br>(1000)   | [12]      |
| BNVO-3                                 | 384.9 (0.1)                                                      | 92.9% at 3 A g <sup>-1</sup><br>(1000) | [13]      |
| S-NVOH                                 | 350 (0.3)                                                        | 88% at 5 A g <sup>-1</sup><br>(1300)   | [14]      |
| Na <sup>+</sup> doping VO <sub>2</sub> | 397 (0.2)                                                        | 75% at 12 A g <sup>-1</sup><br>(3000)  | [15]      |
| NaVO                                   | 427 (0.2)                                                        | 74.3% at 2 A g <sup>-1</sup><br>(1900) | [16]      |
| G-VOH                                  | 386 (0.5)                                                        | 86% at 2 A g <sup>-1</sup><br>(1500)   | [17]      |
| VO                                     | 339 (0.2)                                                        | 74% at 10 A g <sup>-1</sup><br>(2000)  | [18]      |
| P-VO <sub>2</sub> @rGO                 | 342 (0.1)                                                        | 80% at 1 A g <sup>-1</sup><br>(350)    | [19]      |
| Cr-doped VO <sub>2</sub> (B)           | 312.8 (0.1)                                                      | 90% at 5 A g <sup>-1</sup><br>(2000)   | [20]      |
| B-VO <sub>2</sub>                      | 357.6 (0.2)                                                      | 86.1% at 5 A g <sup>-1</sup><br>(4000) | This work |

### 3. Theoretical calculation method

The density functional theory (DFT) calculations were carried out with the VASP code.<sup>21</sup> The Perdew-Burke-Ernzerhof (PBE) functional within generalized gradient approximation (GGA) was used to process the exchange-correlation, while the projector-augmented-wave pseudopotential (PAW) was applied with a kinetic energy cut-off of 400 eV, which was utilized to describe the expansion of the electronic eigenfunctions.<sup>22-23</sup> All atomic positions were fully relaxed until energy and force reached a tolerance of  $1 \times 10^{-5}$  eV and 0.03 eV/Å, respectively. The dispersion corrected DFT-D3 method with the Becke–Johnson damping was employed to consider the long-range interactions<sup>24-25</sup>. Transition states along the reaction pathways and the activation energies were identified by the climbing image nudged elastic band (CI-NEB) method.

#### 4. References

- [1] W. Ding, H. Y. Zheng, H. G. Gao, Q. N. Liu, Z. Hu, S. W. Wang, S. D. Wu, S. M. Fang, S. L. Chou, *Adv. Energy Mater.*, 2021, **11**, 2100973.
- [2] N. Zhang, M. Jia, Y. Y. Dong, J. Z. Xu, Y. C. Liu, L. F. Jiao, F. Y. Cheng, *Adv. Funct. Mater.*, 2019, **29**, 1807331.
- [3] J. W. Ding, Z. G. Du, B. Li, L. Z. Wang, S. W. Wang, Y. J. Gong, S. B. Yang, *Adv. Mater.*, 2019, **31**, 1904369.
- [4] B. Y. Tang, G. Z. Fang, J. Zhou, L. B. Wang, Y. P. Lei, C. Wang, T. Q. Lin, Y. Tang, S. Q. Liang, *Nano Energy*, 2018, **51**, 579-587.
- [5] Y. Lu, S. Y. Han, J. G. Zheng, H. W. Zhao, H. Zhang, G. S. Jiang, L. X. Li, W. M. Zhou, B. G. An, C. G. Sun, *ACS Appl. Mater. Interfaces.*, 2024, **17**, 1001-1013.
- [6] H. Tang, F. Y. Chao, H. Y. Luo, K. S. Yu, J. Wang, H. B. Chen, R. M. Jia, F. Y. Xiong, Y. Q. Pi, P. Luo, Q. Y. An, *ChemSusChem.*, 2023, **16**, e202300403.
- [7] F. H. Cui, J. Zhao, D. X. Zhang, Y. Z. Fang, F. Hu, K. Zhu, *Chem. Eng. J.*, 2020, **390**, 124118.
- [8] H. J. Zeng, J. T. Huang, Y. B. Chen, L. Chen, H. Z. Wu, H. Y. Yang, Z. Chen, *Tungsten*, 2025, **7**, 547-556.
- [9] F. X. Gao, H. G. Gao, K. Zhao, X. Y. Cao, J. W. Ding, S. W. Wang, *J. Colloid Interface Sci.*, 2023, **629**, 928-936.
- [10] Z. Y. Yuan, X. H. Yang, C. Y. Lin, P. X. Xiong, A. M. Su, Y. X. Fang, X. C. Chen, H. S. Fan, F. Y. Xiao, M. D. Wei, Q. R. Qian, Q. H. Chen, L. X. Zeng, *J. Colloid Interface Sci.*, 2023, **640**, 487-497.
- [11] W. Deng, Z. X. Xu, G. Li, X. L. Wang, *Small*, 2023, **19**, 2207754.
- [12] T. Zhou, X. Du, G. Gao, *J. Energy Chem.* 2024, **95**, 9-19.
- [13] Z. H. Deng, W. Shao, H. Y. Wang, Y. B. Wang, J. Sheng, H. C. Mu, L. Cheng, W. J. Wu, *J. Power Sources*, 2024, **614**, 234976.
- [14] J. Zhang, M. S. Wang, M. Zeng, X. P. Li, L. Chen, Z. L. Yang, J. C. Chen, B. S. Guo, Z. Y. Ma, X. Li, *J. Power Sources*, 2021, **496**, 229832.
- [15] Y. Liu, X. Wu, *Nano Energy*, 2021, **86**, 106124.
- [16] G. Q. Jiang, J. C. Zhu, L. X. He, H. M. yang, N. Qiu, Y. Wang, *Acta Mater.*, 2024, **277**, 120222.
- [17] J. Zhang, M. S. Wang, J. L. Zhong, X. Wang, X. Z. Huang, Z. L. Yang, J. C. Chen, B. S. Guo,

- Z. Y. Ma, X. Li, *Mater. Chem. Front.*, 2021, **5**, 7518-7528.
- [18] X. Y. Liu, L. Tao, L. Zhao, M. G. Ma, Z. Y. Liu, Z. Wang, *Mater. Lett.*, 2024, **365**, 136462.
- [19] J. H. Choi, J. S. Park, Y. C. Kang, *Appl. Surf. Sci.*, 2022, **599**, 153890.
- [20] X. H. Chen, X. Z. Zhai, Y. Q. Wu, X. Z. Wang, L. M. Zhang, C. Shang, H.W. Zhang, C.Z. Zhao, J. M. Shang, D. W. Liu, *J. Energy Storage.*, 2025, **114**, 115826.
- [21] G. Kresse, J. Furthmüller, *Comp. Mater. Sci.*, 1996, **6**, 15-50.
- [22] J. P. Perdew, K. Burke, M. Ernzerhof, *Phys. Rev. Lett.* 1996, **77**, 3865-3868.
- [23] P. E. Blochl, *Phys Rev B Condens Matter*, 1994, **50**, 17953-17979.
- [24] S. Grimme, *J Comput Chem*, 2006, **27**, 1787-1799.
- [25] S. Grimme, S. Ehrlich, L. Goerigk, *J. Comput. Chem.*, 2011, **32**, 1456-1465.
- [26] G. Henkelman, B. P. Uberuaga, H. Jónsson, *J. Chem. Phys.*, 2000, **113**, 9901-9904.
